# Supplementary material
Source: PubMed Central journal article supplement (PMC4222529)
Supplement: bi500861x_si_001.pdf [file bi500861x_si_001.pdf]

Supplementary information

# Protein Engineering of the N-terminus of NEMO: Structure Stabilization and Rescue of IKK $\beta$ Binding

*Bingqian Guo,<sup>1</sup> Christopher O. Audu,<sup>2</sup> Jared C. Cochran<sup>3</sup>, Dale Mierke,<sup>1</sup> Maria Pellegrini,<sup>\*1</sup>*

From the <sup>1</sup>Department of Chemistry, Dartmouth College, Hanover NH, US and the <sup>2</sup>Geisel  
School of Medicine, Dartmouth College, Hanover NH, US

<sup>3</sup>Molecular and Cellular Biochemistry Department, Indiana University, Bloomington, IN,  
US

\*To whom correspondence should be addressed: 6128 Burke Hall, Hanover, NH 03755

Tel: [603-646-8103](tel:603-646-8103) ; Fax: 603-646-3946; Email: [Maria.Pellegrini@dartmouth.edu](mailto:Maria.Pellegrini@dartmouth.edu)

**Supplementary Table1.** Primers for the constructs cloning

| Construct           | Primer                                                                 |
|---------------------|------------------------------------------------------------------------|
| GST-NEMO<br>(1-196) | 5'TGGGATCCATGAATAGGCACCTCTGGAGAGCCAAC<br>3'CGCTCGAGGCTGTGCTGCTGCTGCAGC |
| IKK $\beta$         | 5'GATCCGCCATGGCTATGCCAGCCAA<br>3'TATTCCGCGGCCGCTCATTCCGTCTG            |

|               |                                                                                                                                                                               |
|---------------|-------------------------------------------------------------------------------------------------------------------------------------------------------------------------------|
| NEMO(44-111)  | 5'TGGGATCCGAACAGGGCGCTCCTGA<br>3'CGCTCGAGCTTCTCCAGGCCGAGTCT                                                                                                                   |
| NEMOw         | 5'TACTTTCAGGGATCCTGGGAACAGGGCGCTCCT<br>3'AGGAGCGCCCTGTTCCAGGATCCCTGAAAGTA                                                                                                     |
| NEMOwNcc      | 5'GTACTTTCAGGGATCCTGGTCTGTTAAGGAATTGGAAGATAAGAACGA<br>AGA<br>3'CTCCAGGCAGCGCTGGAGCAACTTCTTCAATCTAGCAAC                                                                        |
| NEMOwCcc      | 5'GGCCTGGAGAAGCTCGAGTTGGAAGATAAGAACGAAGAATTGTTGTC<br>TGAA3'GGCTTTGTTAGCAGCCGGATCTCATCTTTCACCAACCAACTTCT<br>TCAATCTAGC                                                         |
| NEMOwDcc      | 5'GGCCTGGAGAAGCTCGAGTTGGAAGATAAGAACGAAGAATTGTTGTC<br>TGAA<br>3'GGCTTTGTTAGCAGCCGGATCTCATCTTTCACCAACCAACTTCTTCAA<br>TCTAGC                                                     |
| NEMOwCcc8aa   | 5'TTGGAAGATAAGAACGAAGAATTGTGATCTGAAATTGCTCATTTGAA<br>GAAC<br>3'GCCCTTCAAATGAGCAATTCAGATCACAATTCTTCGTTCTTATCTTC<br>CAA                                                         |
| FLAG-NEMOwCcc | 5'AGCTGGCATGCGTTTAAACTTAAGCTTGGTACCACCATGGACTACAAA<br>GACGATGACGACAAGTGGGAACAGGGCGCTCCTGAGACC<br>3'GCGGGTTTAAACGGGCCCTCTAGACTCGAGTTATCTTTCACCAACCAA<br>CTTCTTCAATCTAGCAACTTCG |

Black—cloning primers, blue—mutagenesis primers

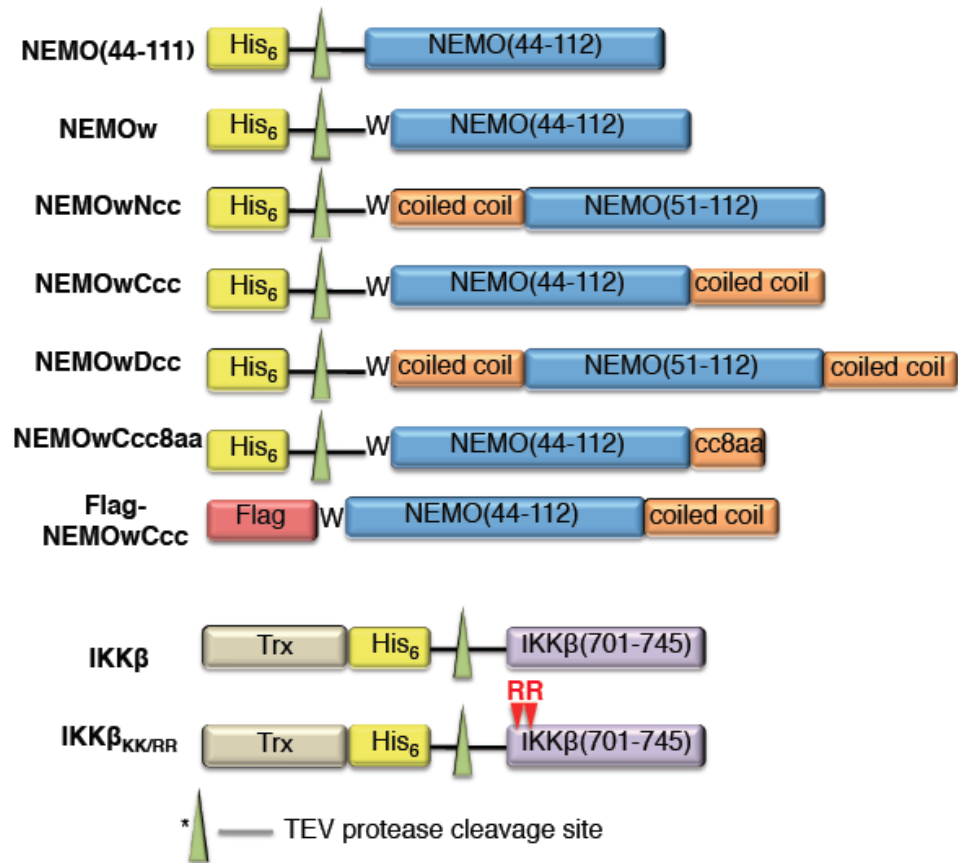

**Supplemental Figure 1.** Schematic representation of constructs cloned and used in this study

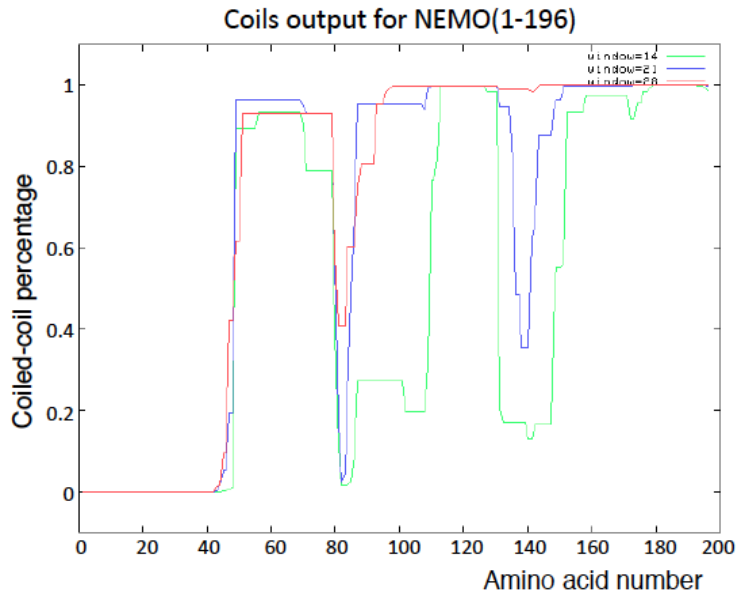

**Supplemental Figure 2.** Coiled-coil secondary structure prediction of NEMO(1-196) as calculated by the program COILS.<sup>1</sup>

Supplementary reference

(1) Lupas, A., Van Dyke, M., and Stock, J. (1991) Predicting coiled coils from protein sequences. *Science* 252, 1162–1164.
